# Supplementary material for: In Situ-Forming Gels Loaded with Stimuli-Responsive Gated Mesoporous Silica Nanoparticles for Local Sustained Drug Delivery
Source: MDPI journal article supplement (doi:10.3390/pharmaceutics15041071), 2023-03-26
Supplement: s1 [file s1]

# Supporting information

## In Situ-Forming Gels Loaded with Stimuli-Responsive Gated Mesoporous Silica Nanoparticles for Local Sustained Drug Delivery

Cristina de la Torre <sup>1,2</sup>, Carmen Coll <sup>3</sup>, Amelia Ultimo <sup>3,\*</sup>, Félix Sancenón <sup>1,2,4</sup>,  
Ramón Martínez-Máñez <sup>1,2,4</sup> and Eduardo Ruiz-Hernández <sup>3,\*</sup>

<sup>1</sup> Instituto Interuniversitario de Investigación de Reconocimiento Molecular y Desarrollo Tecnológico (IDM), Universitat Politècnica de València, Universitat de València, Camino de Vera s/n, 46022 Valencia, Spain

<sup>2</sup> CIBER de Bioingeniería, Biomateriales y Nanomedicina (CIBER-BBN), 28029 Madrid, Spain

<sup>3</sup> School of Pharmacy and Pharmaceutical Sciences, Trinity College Dublin (TCD), D02 W272 Dublin, Ireland

<sup>4</sup> Departamento de Química, Universitat Politècnica de València, Camino de Vera s/n, 46022 Valencia, Spain

### Materials characterization

#### *DLS studies*

Dynamic light scattering (DLS) studies for MSNs calcinated, **S2** and **S3** were performed. All measurements were carried out at 25 °C using a Malvern Zetasizer Nano ZS instrument in triplicate, on previously sonicated dispersions of the nanomaterials in water at concentration of 0.01 mg mL<sup>-1</sup>. Results are listed in Figure S1. As can be seen, an increase in the hydrodynamic particle diameter after the surface modification was observed, which resulted in a diameter of 122.5 nm and 140.2 for the final **S2** and **S3** nanodevices, respectively.

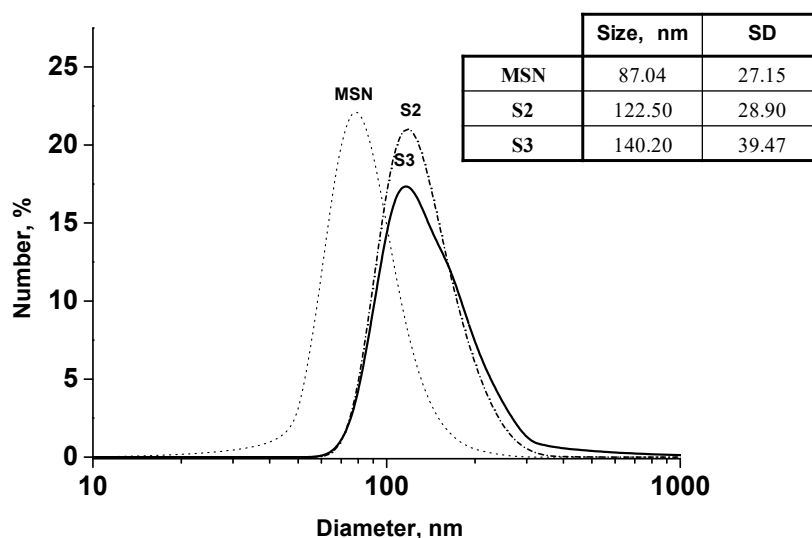

**Figure S1.** Size distribution by number of particles obtained by DLS studies for MSN, **S2** and **S3**.

### *N<sub>2</sub> adsorption-desorption isotherms*

The N<sub>2</sub> adsorption-desorption isotherms of the calcined MSN material showed two adsorption steps typical of these mesoporous materials (black curve in Figure S2). A first adsorption step at  $P/P_0$  values between 0.1 and 0.3, in agreement with a type IV isotherm corresponding to the nitrogen condensation inside the mesopores by capillarity, was observed. With the application of Barret-Joyner-Halenda (BJH) model on the adsorption branch of the isotherm and PXRD studies, a pore diameter and a pore volume were calculated to be 3.2 nm and 0.91 cm<sup>3</sup> g<sup>-1</sup>, respectively. Using the Brunauer, Emmett and Teller (BET) model, a specific surface area of 919.6 m<sup>2</sup> g<sup>-1</sup> was calculated. A second feature of the N<sub>2</sub> adsorption-desorption isotherms of the calcined MSN appeared on the curve at high relative pressure ( $P/P_0 > 0.8$ ), which corresponds to the filling of the large pores between the nanoparticles due to textural porosity. On the other hand, N<sub>2</sub> adsorption-desorption isotherms of **S1** and **S2** were typical of mesoporous with filled mesopores (see Figure S2 red and blue curves, respectively).

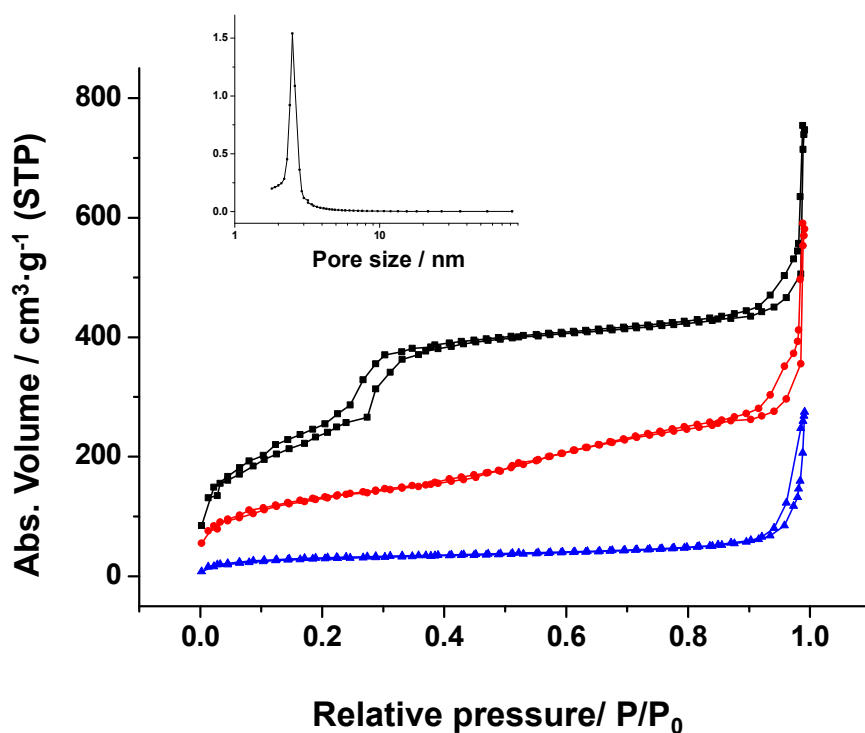

**Figure S2.** Nitrogen adsorption-desorption isotherms for calcined MSNs (black), **S1** material (red) and **S2** material (blue). The inset shows the pore size distribution of the starting MSNs.

### Degradation of HA gels loaded with silica nanoparticles

**A)**

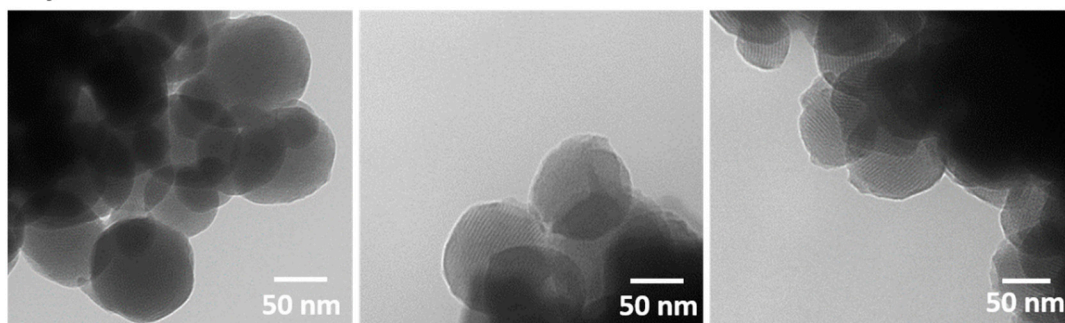

**B)**

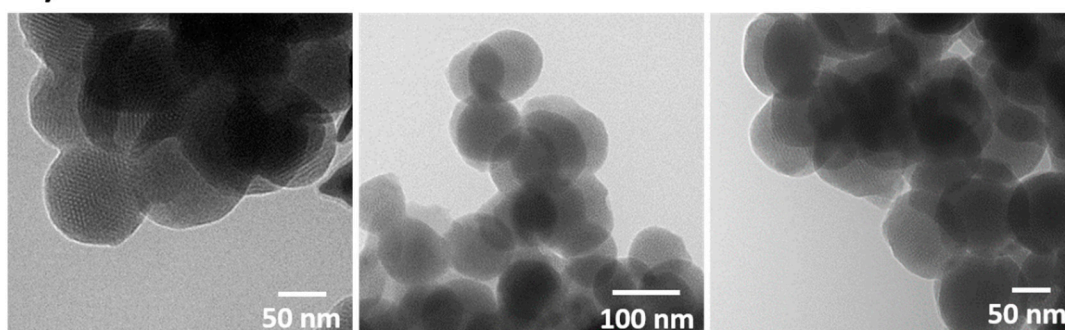

**C)**

|   | Diameter (nm)    | % of particles (Intensity) |
|---|------------------|----------------------------|
| A | $1.6 \pm 7.2$    | 20                         |
|   | $26.6 \pm 8.5$   | 54                         |
|   | $157.1 \pm 47.9$ | 20                         |
| B | $1.1 \pm 7.9$    | 17                         |
|   | $27.4 \pm 5.9$   | 45                         |
|   | $189.0 \pm 48.1$ | 33                         |

**Figure S3.** (A) TEM images of nanoparticles released from **HA-S2** gels after 10 days. (B) TEM images of nanoparticles delivered from **HA-S3** gels after 10 days. (C) Mean size values from DLS studies of nanoparticles after 10 days from **HA-S2** (A) and **HA-S3** (B).
